# Supplementary material
Source: PubMed Central journal article supplement (PMC7896111)

**No  
4-NQO treatment**

---

**4-NQO treatment (10 wks)**

---

**Normal epithelium**

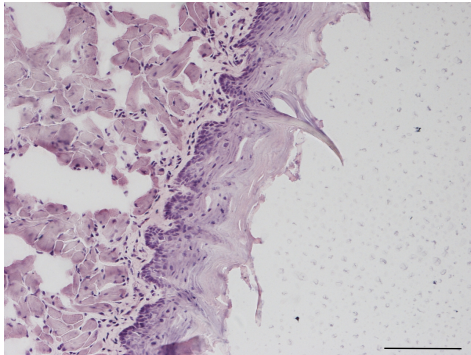

**Pre-neoplastic tissue**

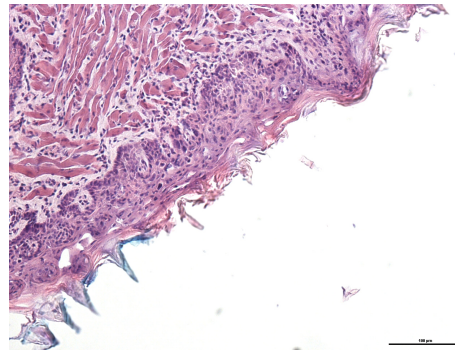

**Non-invasive SCC**

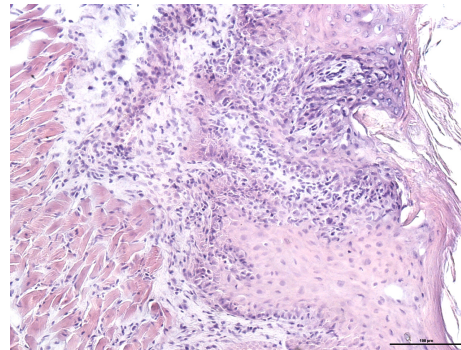

**Invasive SCC**

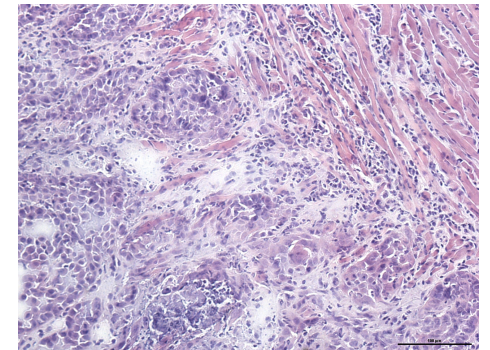

Supplement: bgaa019_suppl_supplementary_figure_2.pdf [file bgaa019_suppl_supplementary_figure_2.pdf]
