# Supplementary material
Source: PubMed Central journal article supplement (PMC7896111)
Supplement: bgaa019_suppl_supplementary_figure_3.pdf [file bgaa019_suppl_supplementary_figure_3.pdf]

**T6 aligned to pre-neoplastic age-matched controls**

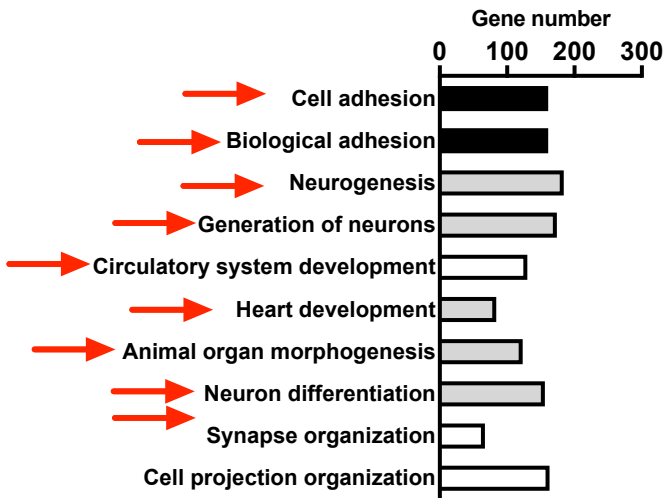

**T6 aligned to tumor age-matched controls**

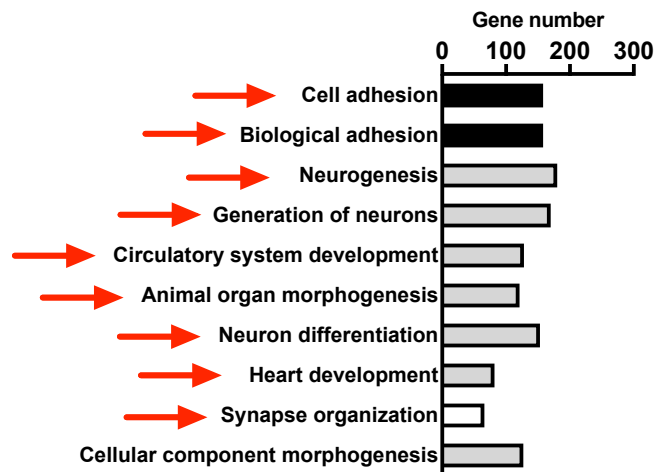

Cell adhesion pathways
  Development
  Transport
  Other pathways
