# Supplementary material
Source: PubMed Central journal article supplement (PMC7896111)
Supplement: bgaa019_suppl_supplementary_figure_4.pdf [file bgaa019_suppl_supplementary_figure_4.pdf]

## Prognostic value of Celsr1, Celsr3, and Ddr1 in Head and Neck Cancer

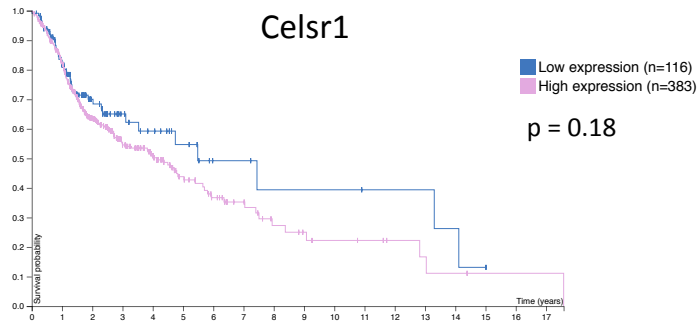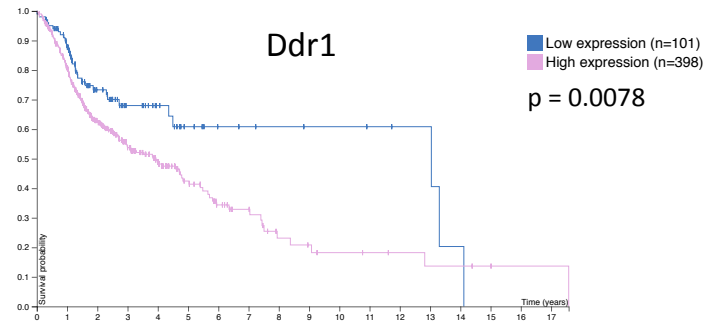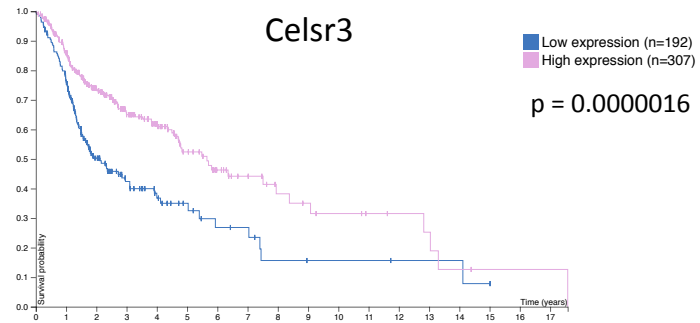

|                 | Sex        |            | Tumor stage |           |           |            |           |          | n/a       |
|-----------------|------------|------------|-------------|-----------|-----------|------------|-----------|----------|-----------|
|                 | F          | M          | i           | ii        | iii       | iva        | ivb       | ivc      |           |
| <b>Patients</b> | <b>133</b> | <b>366</b> | <b>25</b>   | <b>69</b> | <b>78</b> | <b>247</b> | <b>11</b> | <b>1</b> | <b>68</b> |
