# Supplementary material
Source: PubMed Central journal article supplement (PMC7896111)
Supplement: bgaa019_suppl_supplementary_figure_5.pdf [file bgaa019_suppl_supplementary_figure_5.pdf]

Table Obscn mutations in pre-neoplastic and tumor ECCLSC

| Sample | Chr. position                                | Substitution                   | Category/<br>Type                          | HGVS.p                                                                  | VAF (%)                          | Mutation                                                        |
|--------|----------------------------------------------|--------------------------------|--------------------------------------------|-------------------------------------------------------------------------|----------------------------------|-----------------------------------------------------------------|
| PN1    | 59056799                                     | C>A                            | SNV/LOH                                    | p.Gly4465Val                                                            | 76.32                            | Missense                                                        |
| PN2    | 59056786<br>59042950<br>59056799             | TCCCC>T<br>T>C<br>C>A          | Indel/LOH<br>SNV/LOH<br>SNV/LOH            | p.Gly4468fs<br>p.Thr5363Ala<br>p.Gly4465Val                             | 83.33<br>90.91<br>88.24          | Frameshift<br>Missense<br>Missense                              |
| PN3    | 59038459<br>59039150<br>59039164             | G>C<br>G>C<br>T>A              | SNV/LOH<br>SNV/LOH<br>SNV/LOH              | p.Thr5310Ser<br>p.Pro5080Ala<br>p.Gln5075Leu                            | 100<br>81.82<br>84.62            | Missense<br>Missense<br>Missense                                |
| PN5    | 59041818<br>59041841<br>59041844<br>59130623 | TGGGGCA>T<br>C>T<br>G>A<br>C>T | Indel/Som<br>SNV/Som<br>SNV/Som<br>SNV/Som | p.Arg797His<br>p.Ala4847Thr<br>p.Pro4846Ser<br>p.Ala4853_Pro48<br>54del | 35.71<br>42.86<br>35.71<br>41.67 | Missense<br>Missense<br>Missense<br>Disruptive<br>inframe delet |
| T1     | 59032932<br>59051269<br>59099756<br>59129633 | G>A<br>G>C<br>C>A<br>C>T       | SNV/Som<br>SNV/Som<br>SNV/Som<br>SNV/Som   | p.Ser5770Leu<br>pHis4427Asp<br>p.Ala1664Ser<br>p.Asp862Asn              | 30<br>22.73<br>22.39<br>29.25    | Missense<br>Missense<br>Missense<br>Missense                    |
| T2     | 59056769<br>59056799                         | A>G<br>C>A                     | SNV/LOH<br>SNV/LOH                         | p.Met4475Thr<br>pGly4465Val                                             | 75<br>84.62                      | Missense<br>Missense                                            |
| T3     | 59028995<br>59056065                         | C>A<br>C>G                     | SNV/Som<br>SNV/Som                         | p.Gly79Trp<br>p.Gly4081Ala                                              | 45.16<br>41.03                   | Misense<br>Missense                                             |
| T4     | 59068008<br>59069061<br>59076194<br>59080757 | C>A<br>C>G<br>C>G<br>G>C       | SNV/Som<br>SNV/Som<br>SNV/Som<br>SNV/Som   | P.Gln3405His<br>p.Gly3327Arg<br>p.Ala2869Pro<br>p.Arg2211Gly            | 28.21<br>42.11<br>27.27<br>40    | Missense<br>Missense<br>Missense<br>Missense                    |
| T6     | 59034137<br>59103395<br>59124715<br>59041775 | C<A<br>G>A<br>C>A<br>T>C       | SNV/Som<br>SNV/Som<br>SNV/Som<br>SNV/LOH   | p.Gly5718Val<br>p.Arg1554Cys<br>p.Cys977Phe<br>p.Ile4869Val             | 38.1<br>25.32<br>21.74<br>75     | Missense<br>Missense<br>Missense<br>Missense                    |
