# Supplementary material
Source: PubMed Central journal article supplement (PMC7896111)

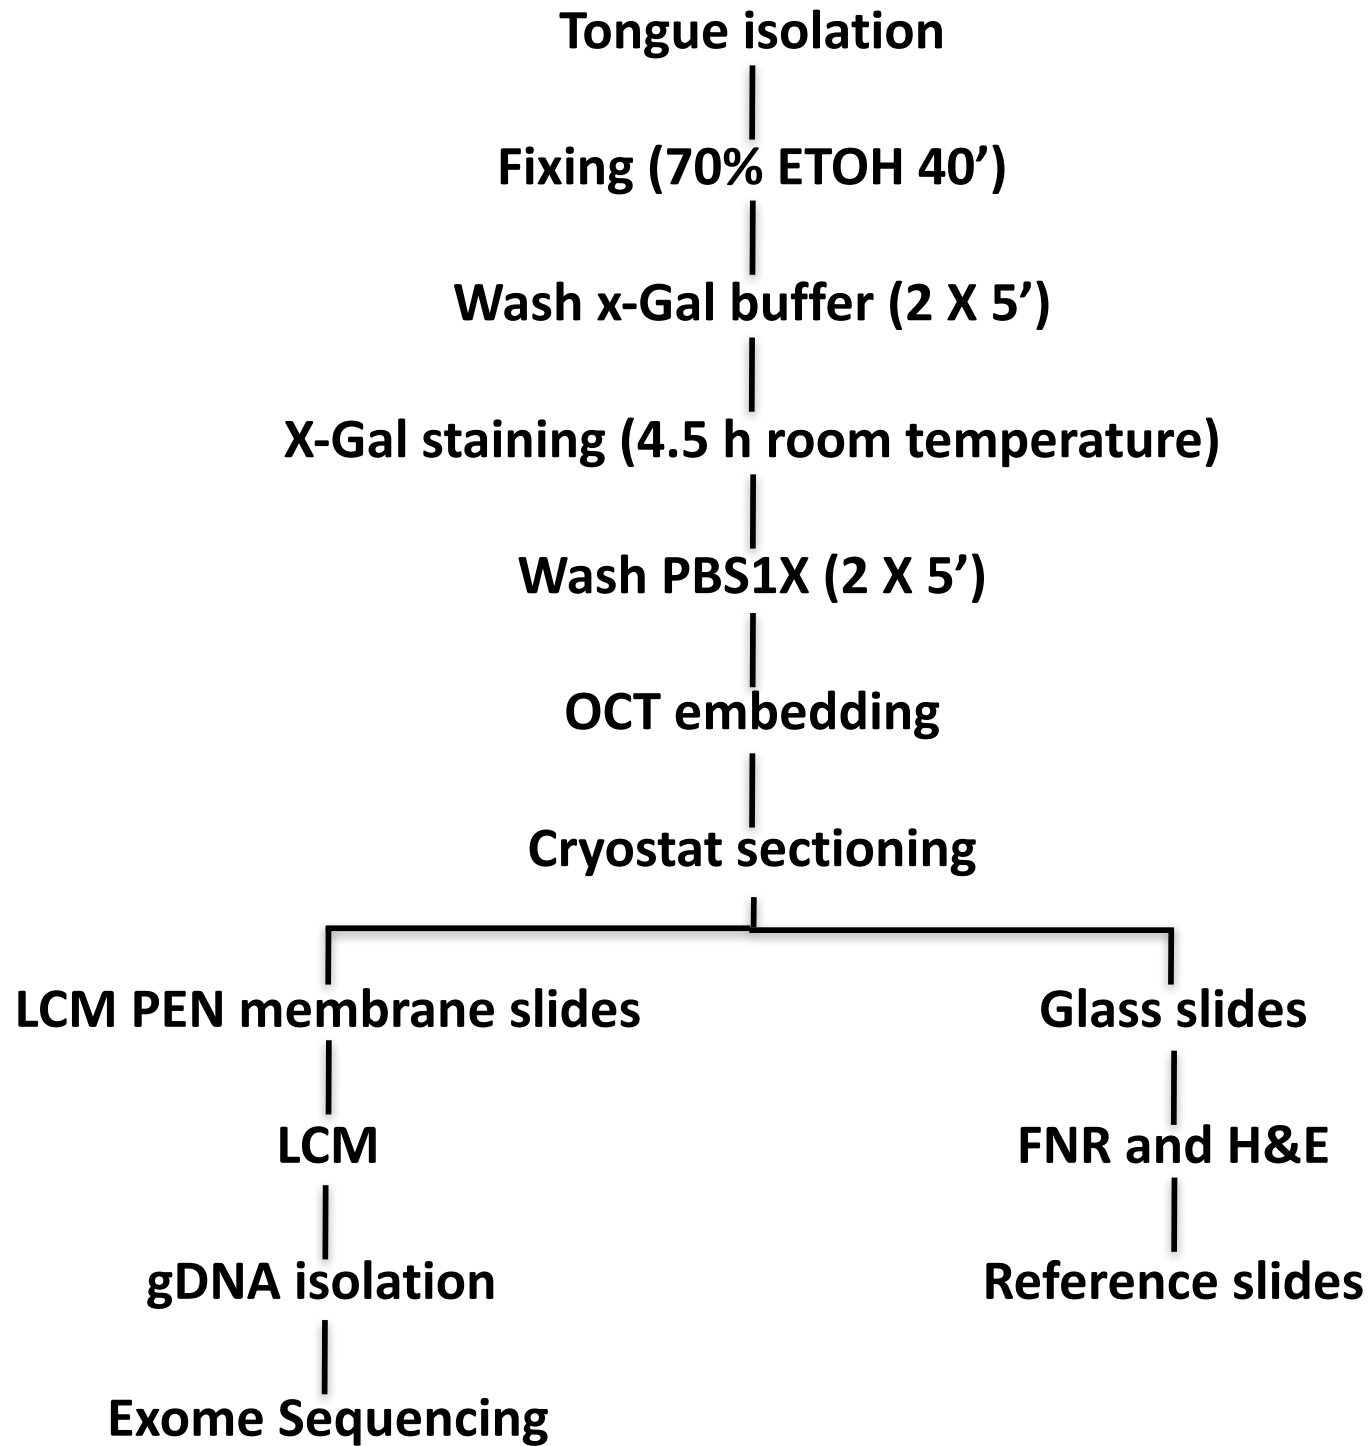

Supplement: bgaa019_suppl_supplementary_figure_1.pdf [file bgaa019_suppl_supplementary_figure_1.pdf]

# Transitions

## Pre-neoplastic LSCCs

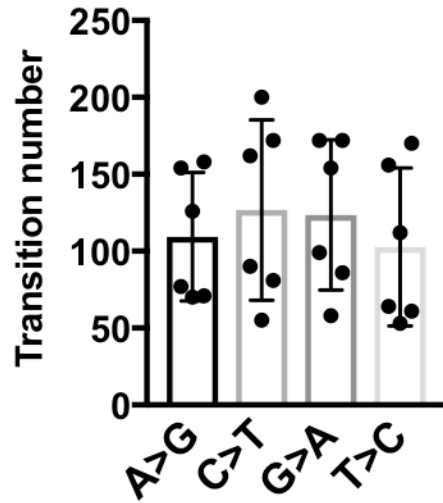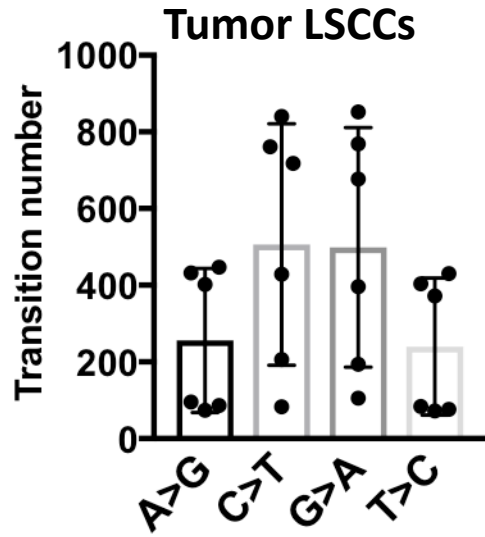

# Transversions

## Pre-neoplastic LSCCs

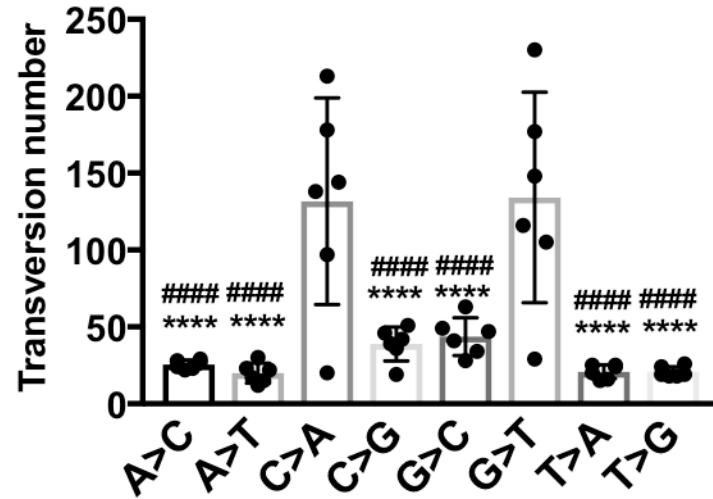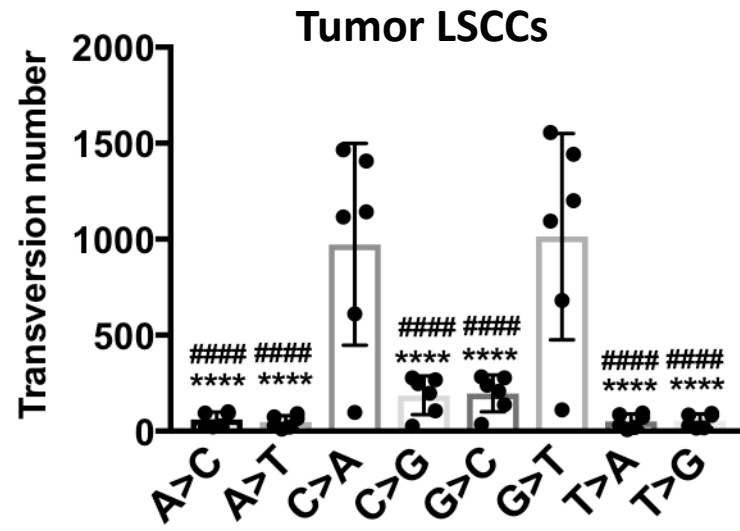

Supplement: bgaa019_suppl_supplementary_figure_6.pdf [file bgaa019_suppl_supplementary_figure_6.pdf]
